# Supplementary material for: Association of leukocyte telomere length and the risk of age-related hearing impairment in Chinese Hans
Source: PubMed Central journal article supplement (PMC5578975; doi:10.1038/s41598-017-10680-9), 2017-08-31
Supplement: 41598_2017_10680_MOESM1_ESM.pdf [file 41598_2017_10680_MOESM1_ESM.pdf]

**Association of leukocyte telomere length and the risk of age-related hearing  
impairment in Chinese Hans**

Han Liu, Huajie Luo, Tao Yang, Hao Wu, Dan Chen

**Supplementary Table**

**Supplementary Table 1. Association between T/S ratio and the presence of ARHI (47 cases vs. 43 controls).**

“Proc surveyselect” process was conducted to select cases randomly from the 666 ARHI patients (N=47). OR (odds ratio), 95% CI (Confidence Interval) and *P* value indicated the association between T/S ratio of leukocyte telomere length (LTL) and the presence of ARHI by the use of an age adjusted logistic regression model. The selection was repeated 100 times. Results showed that 84% of them resulted in *P*<0.05, suggesting that longer LTL reduced the incidence of ARHI.

|    | OR adjusted for age | 95%CI                 | <i>P</i>      |
|----|---------------------|-----------------------|---------------|
| 1  | 0.584               | (0.371, 0.918)        | 0.0199        |
| 2  | 0.507               | (0.293, 0.878)        | 0.0154        |
| 3  | 0.383               | (0.199, 0.738)        | 0.0041        |
| 4  | 0.388               | (0.212, 0.712)        | 0.0022        |
| 5  | 0.513               | (0.295, 0.894)        | 0.0184        |
| 6  | <b>0.851</b>        | <b>(0.525, 1.380)</b> | <b>0.5131</b> |
| 7  | 0.494               | (0.281, 0.870)        | 0.0146        |
| 8  | 0.527               | (0.299, 0.927)        | 0.0263        |
| 9  | 0.440               | (0.235, 0.825)        | 0.0104        |
| 10 | 0.367               | (0.196, 0.688)        | 0.0018        |
| 11 | 0.480               | (0.279, 0.825)        | 0.0079        |
| 12 | 0.506               | (0.286, 0.896)        | 0.0194        |
| 13 | 0.584               | (0.351, 0.972)        | 0.0384        |
| 14 | 0.560               | (0.323, 0.972)        | 0.0393        |
| 15 | 0.565               | (0.330, 0.968)        | 0.0377        |
| 16 | 0.279               | (0.133, 0.584)        | 0.0007        |

|    |       |                |        |
|----|-------|----------------|--------|
| 17 | 0.649 | (0.395, 1.067) | 0.0882 |
| 18 | 0.405 | (0.213, 0.771) | 0.0059 |
| 19 | 0.606 | (0.384, 0.954) | 0.0304 |
| 20 | 0.358 | (0.188, 0.680) | 0.0017 |
| 21 | 0.613 | (0.402, 0.934) | 0.0229 |
| 22 | 0.343 | (0.169, 0.694) | 0.0029 |
| 23 | 0.627 | (0.388, 1.013) | 0.0565 |
| 24 | 0.484 | (0.264, 0.888) | 0.0192 |
| 25 | 0.809 | (0.584, 1.120) | 0.2022 |
| 26 | 0.624 | (0.409, 0.953) | 0.0291 |
| 27 | 0.623 | (0.399, 0.973) | 0.0375 |
| 28 | 0.679 | (0.438, 1.053) | 0.0840 |
| 29 | 0.494 | (0.287, 0.848) | 0.0106 |
| 30 | 0.435 | (0.246, 0.769) | 0.0042 |
| 31 | 0.549 | (0.319, 0.947) | 0.0310 |
| 32 | 0.409 | (0.212, 0.791) | 0.0079 |
| 33 | 0.650 | (0.434, 0.975) | 0.0372 |
| 34 | 0.481 | (0.275, 0.841) | 0.0102 |
| 35 | 0.421 | (0.225, 0.790) | 0.0070 |
| 36 | 0.349 | (0.180, 0.679) | 0.0019 |
| 37 | 0.486 | (0.279, 0.845) | 0.0107 |
| 38 | 0.611 | (0.385, 0.970) | 0.0365 |
| 39 | 0.643 | (0.388, 1.067) | 0.0876 |
| 40 | 0.520 | (0.298, 0.909) | 0.0217 |
| 41 | 0.476 | (0.272, 0.833) | 0.0094 |
| 42 | 0.365 | (0.191, 0.698) | 0.0023 |
| 43 | 0.583 | (0.374, 0.910) | 0.0175 |
| 44 | 0.499 | (0.292, 0.852) | 0.0108 |
| 45 | 0.461 | (0.275, 0.775) | 0.0034 |

|    |       |                |        |
|----|-------|----------------|--------|
| 46 | 0.437 | (0.235, 0.812) | 0.0088 |
| 47 | 0.649 | (0.388, 1.085) | 0.0992 |
| 48 | 0.427 | (0.229, 0.798) | 0.0077 |
| 49 | 0.606 | (0.355, 1.033) | 0.0655 |
| 50 | 0.371 | (0.198, 0.692) | 0.0019 |
| 51 | 0.423 | (0.230, 0.779) | 0.0057 |
| 52 | 0.306 | (0.151, 0.619) | 0.0010 |
| 53 | 0.345 | (0.183, 0.650) | 0.0010 |
| 54 | 0.270 | (0.132, 0.554) | 0.0004 |
| 55 | 0.442 | (0.238, 0.822) | 0.0099 |
| 56 | 0.492 | (0.285, 0.848) | 0.0107 |
| 57 | 0.637 | (0.381, 1.066) | 0.0859 |
| 58 | 0.441 | (0.243, 0.802) | 0.0073 |
| 59 | 0.587 | (0.369, 0.933) | 0.0243 |
| 60 | 0.464 | (0.268, 0.802) | 0.0060 |
| 61 | 0.466 | (0.255, 0.852) | 0.0132 |
| 62 | 0.605 | (0.354, 1.034) | 0.0661 |
| 63 | 0.467 | (0.241, 0.901) | 0.0233 |
| 64 | 0.358 | (0.185, 0.693) | 0.0023 |
| 65 | 0.726 | (0.469, 1.121) | 0.1485 |
| 66 | 0.742 | (0.474, 1.161) | 0.1910 |
| 67 | 0.448 | (0.253, 0.795) | 0.0061 |
| 68 | 0.372 | (0.187, 0.742) | 0.0050 |
| 69 | 0.573 | (0.345, 0.953) | 0.0318 |
| 70 | 0.498 | (0.276, 0.897) | 0.0202 |
| 71 | 0.608 | (0.365, 1.013) | 0.0560 |
| 72 | 0.491 | (0.278, 0.866) | 0.0140 |
| 73 | 0.413 | (0.220, 0.775) | 0.0059 |
| 74 | 0.558 | (0.326, 0.955) | 0.0333 |

|     |       |                |        |
|-----|-------|----------------|--------|
| 75  | 0.374 | (0.190, 0.734) | 0.0043 |
| 76  | 0.613 | (0.377, 0.995) | 0.0478 |
| 77  | 0.470 | (0.250, 0.881) | 0.0186 |
| 78  | 0.499 | (0.284, 0.876) | 0.0155 |
| 79  | 0.355 | (0.192, 0.657) | 0.0010 |
| 80  | 0.578 | (0.344, 0.970) | 0.0381 |
| 81  | 0.513 | (0.293, 0.898) | 0.0196 |
| 82  | 0.399 | (0.214, 0.744) | 0.0038 |
| 83  | 0.532 | (0.313, 0.905) | 0.0199 |
| 84  | 0.690 | (0.438, 1.087) | 0.1091 |
| 85  | 0.414 | (0.216, 0.792) | 0.0077 |
| 86  | 0.658 | (0.393, 1.103) | 0.1121 |
| 87  | 0.391 | (0.207, 0.738) | 0.0038 |
| 88  | 0.343 | (0.173, 0.678) | 0.0021 |
| 89  | 0.604 | (0.390, 0.934) | 0.0233 |
| 90  | 0.410 | (0.215, 0.780) | 0.0066 |
| 91  | 0.376 | (0.201, 0.704) | 0.0022 |
| 92  | 0.323 | (0.155, 0.672) | 0.0025 |
| 93  | 0.596 | (0.368, 0.967) | 0.0359 |
| 94  | 0.349 | (0.182, 0.670) | 0.0016 |
| 95  | 0.509 | (0.307, 0.846) | 0.0091 |
| 96  | 0.655 | (0.419, 1.023) | 0.0626 |
| 97  | 0.392 | (0.212, 0.726) | 0.0029 |
| 98  | 0.269 | (0.134, 0.541) | 0.0002 |
| 99  | 0.473 | (0.266, 0.840) | 0.0106 |
| 100 | 0.374 | (0.199, 0.703) | 0.0022 |

---
